# Supplementary material
Source: PubMed Central journal article supplement (PMC4687684)
Supplement: EMBJ-34-2921-s001.pdf [file EMBJ-34-2921-s001.pdf]

**Table of Content**

Appendix Figures S1–S7

Appendix Tables S1–S5

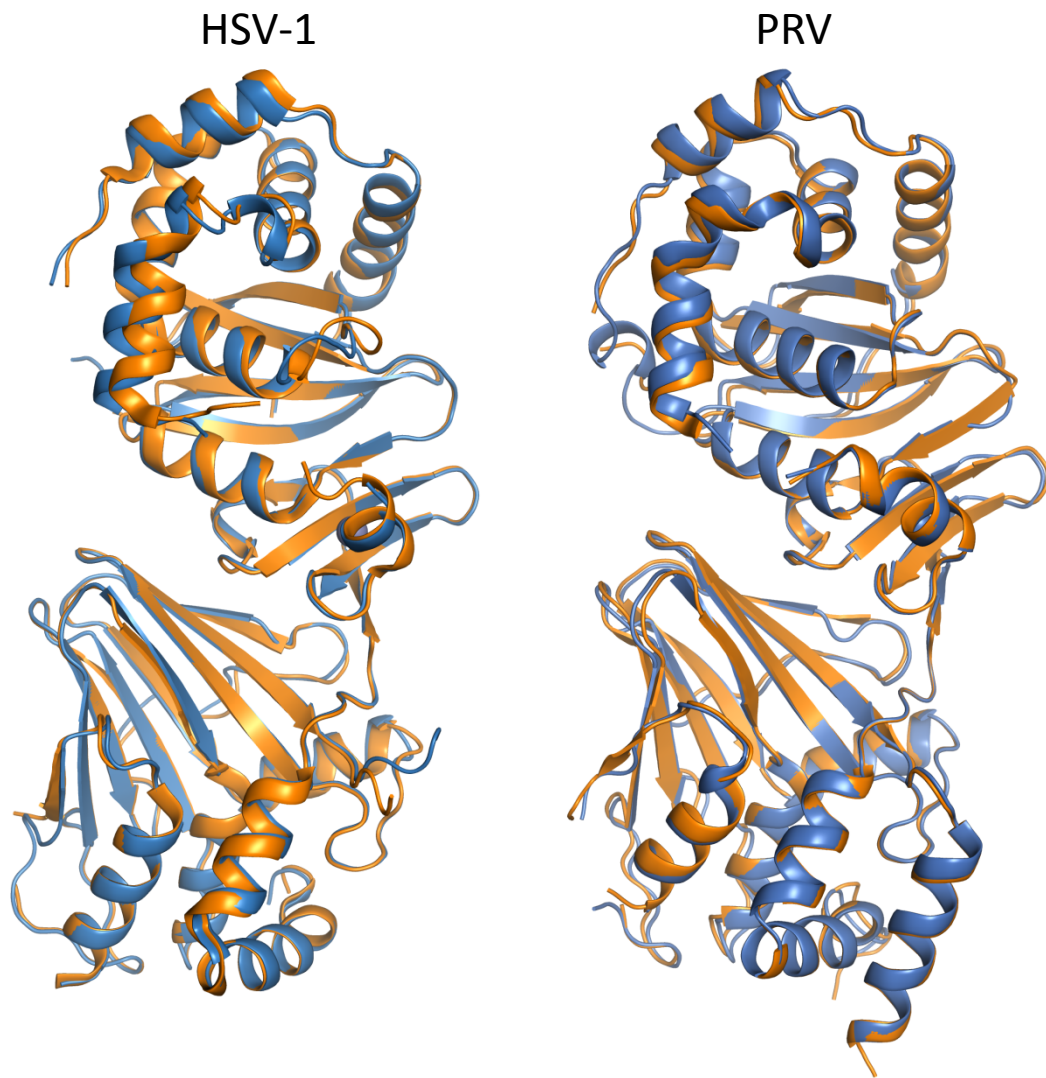

**Figure S1: Superposition of NCS mates in for HSV-1 and PRV NEC.** Chains A and B are in orange, chains C and D in dark blue. HSV-1 NECs superpose with an RMSD of 0.42 Å and PRV NECs with an RMSD of 0.60 Å.

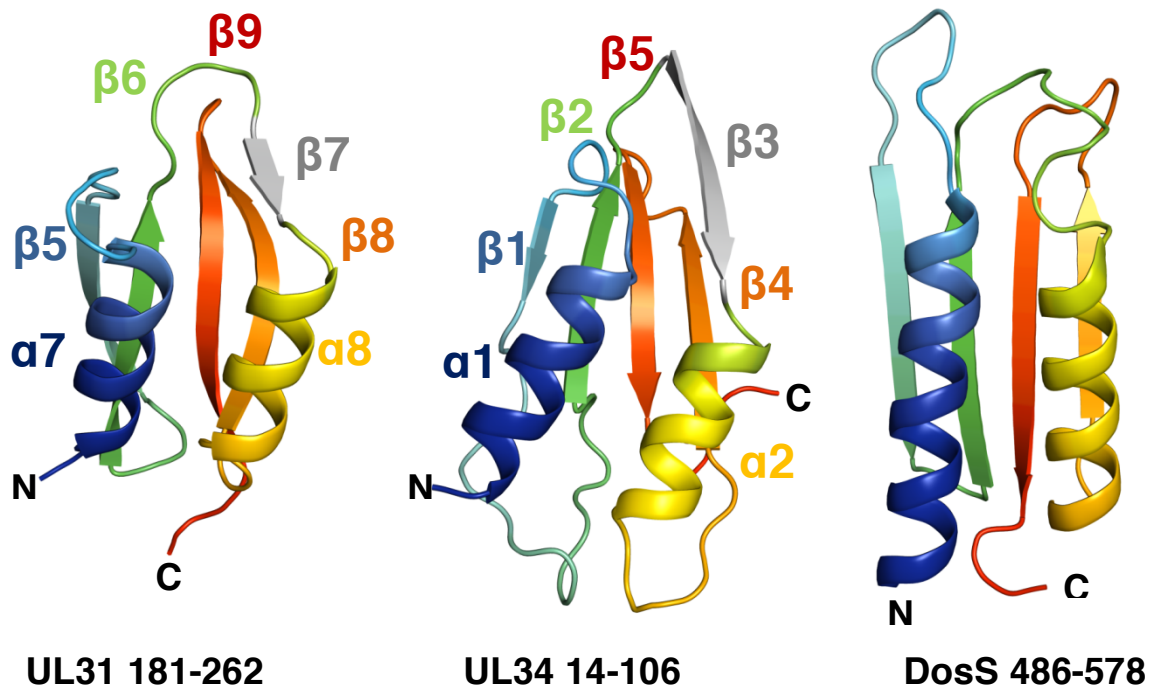

**Figure S2: Comparison of HSV-1 UL31 and UL34 Bergerat-like fold to DosS ATP-binding domain.** The molecules are colored in rainbow ranging from blue (N terminus) to red (C terminus). The additional  $\beta$  strand, which is not present in DosS or other members of the GHKL ATPase/kinase superfamily, is colored in grey. UL31 181-262 and UL34 14-106 overlay with an rmsd of 4.28 Å. The Bergerat fold in DosS (486-578) superposes onto UL31 with a Z-score of 3.9 and an RMSD of 3.99 Å and onto UL34 with a Z score of 3.4 and an RMSD of 5.28 Å. Neither UL31 nor UL34 contain a nucleotide-binding pocket.

### Interface 1

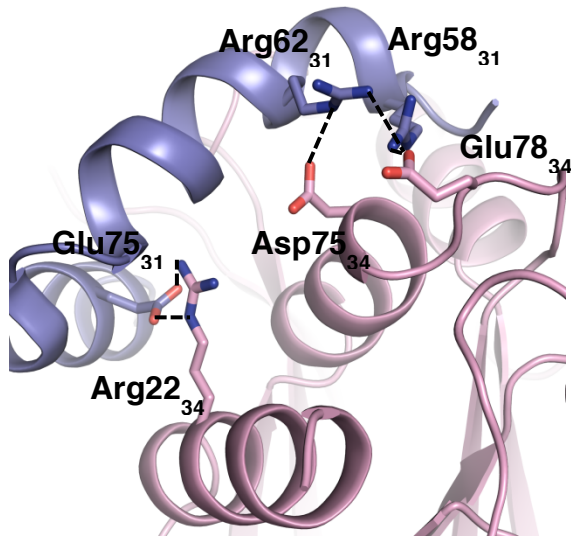

### Interface 2

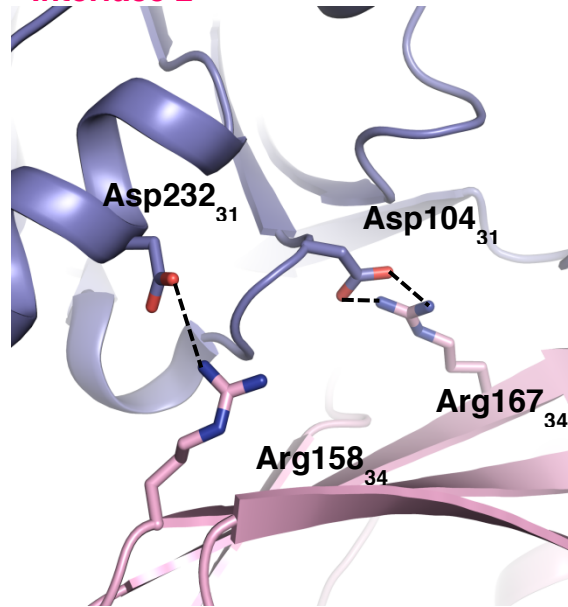

Figure S3: Salt bridges at interface 1 and 2 in HSV-1 NEC. UL31 is colored slate and UL34 pink.

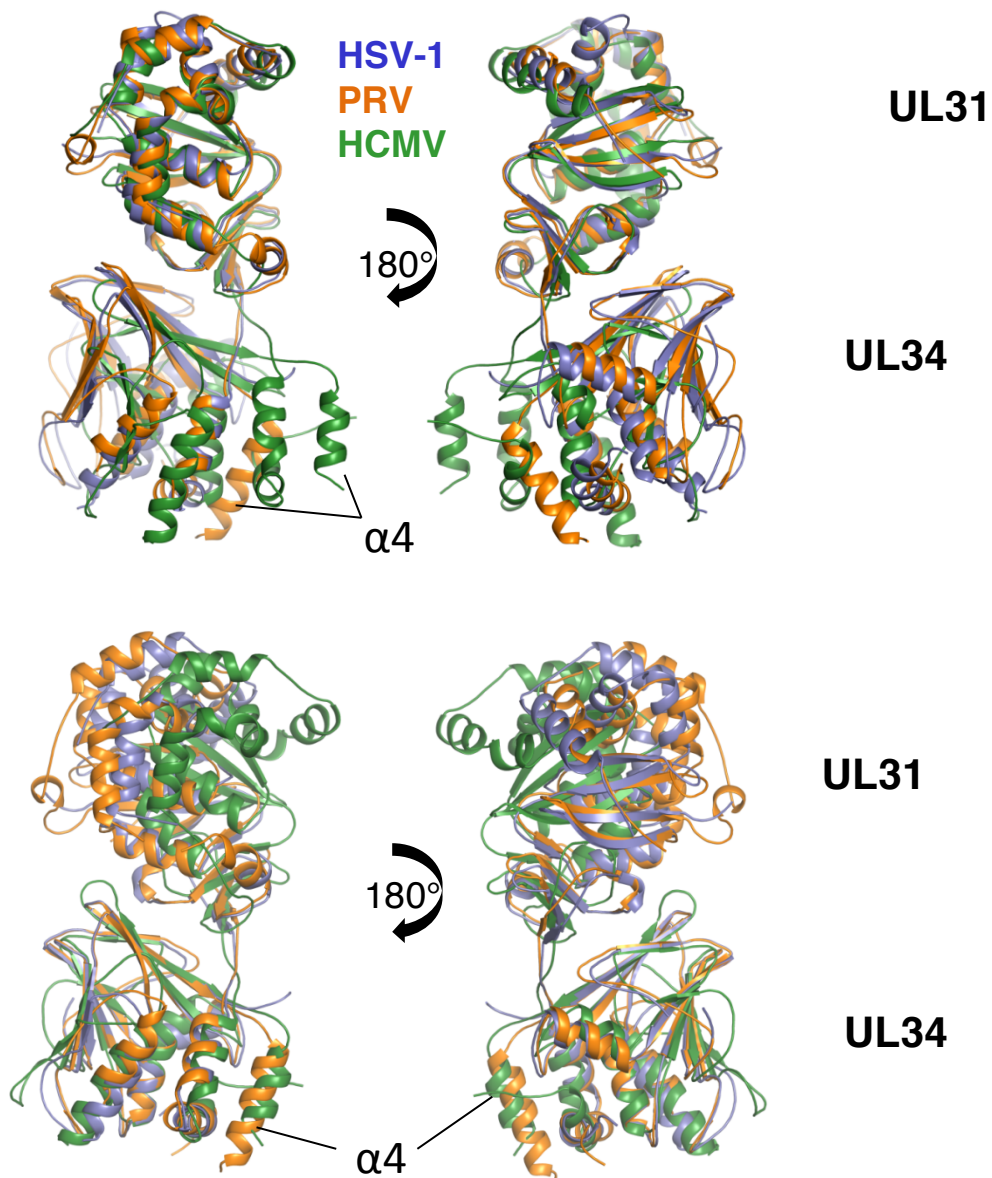

**Figure S4: Superposition of NEC from HSV-1, PRV and HCMV.** HSV-1 NEC is shown in slate, PRV NEC in orange and HCMV NEC in forest. While the individual NEC subunits, UL31 and UL34, are very similar in all three complexes, their relative orientations vary, especially between the NECs from  $\alpha$ - and  $\beta$ -herpesviruses. In the top panel, PRV UL31 and HCMV UL53 were superposed onto HSV-1 UL31 to show differences in UL34 (or HCMV UL50) orientations. Compared to HSV-1 UL34, PRV UL34 is shifted to the left (left panel), whereas HCMV UL50 is shifted to the right. Note that helix  $\alpha_4$ , while present in both PRV UL34 and HCMV UL50, is positioned differently, strengthening the hypothesis that this helix is flexible. The RMSD between HSV-1 UL31 and HCMV UL53 is 2.10 Å. All loops are smoothed for clarity. In the bottom panel, PRV UL34 and HCMV UL50 were superposed onto HSV-1 UL34. The RMSD between HSV-1 UL34 and HCMV UL50 is 1.63 Å.

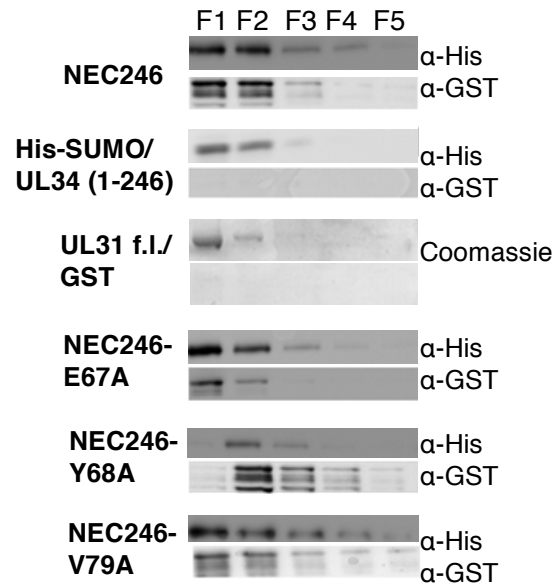

**Figure S5: *In vitro* NEC formation of UL31 and UL34 mutants.** Constructs were coexpressed in *E. coli* and purified using Ni-NTA affinity chromatography. The first five fractions (F1-F5) after extensive washing are shown. His-SUMO-UL31 and GST-UL34 were detected by 12% SDS-PAGE and analyzed either by Coomassie staining or by Western Blot with anti-His or anti-GST antibodies, respectively. NEC246 contains His-SUMO-UL31 and GST-UL34(1-246) and serves as a positive control. For negative controls, UL31 or UL34 were coexpressed with GST or His-SUMO, respectively. No complex formation was observed for the negative controls, but all mutants were able to form complexes. GST-UL34(1-246) is prone to degradation.

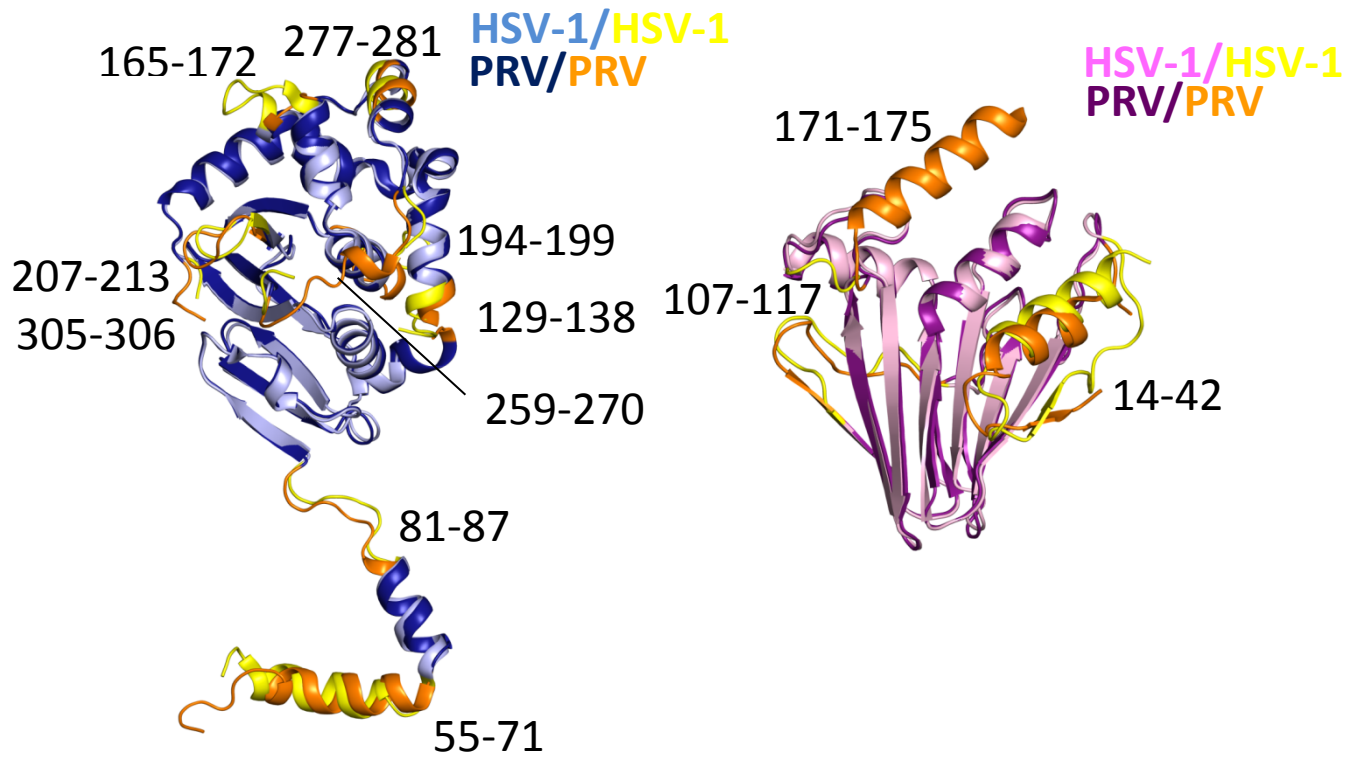

**Figure S6: Superposition of HSV-1 and PRV UL31 and UL34.** HSV-1 UL31 is shown in lightblue and UL34 in lightpink. PRV UL31 is shown in blue and UL34 in purple. Regions with variation are labeled with the residues in HSV-1 and coloured yellow or orange for HSV-1 and PRV, respectively. The rmsd for UL31 is 1.169 Å and for UL34 0.690 Å. The main difference is helix  $\alpha$ 4 in UL34, which is not resolved in the HSV-1 structure.

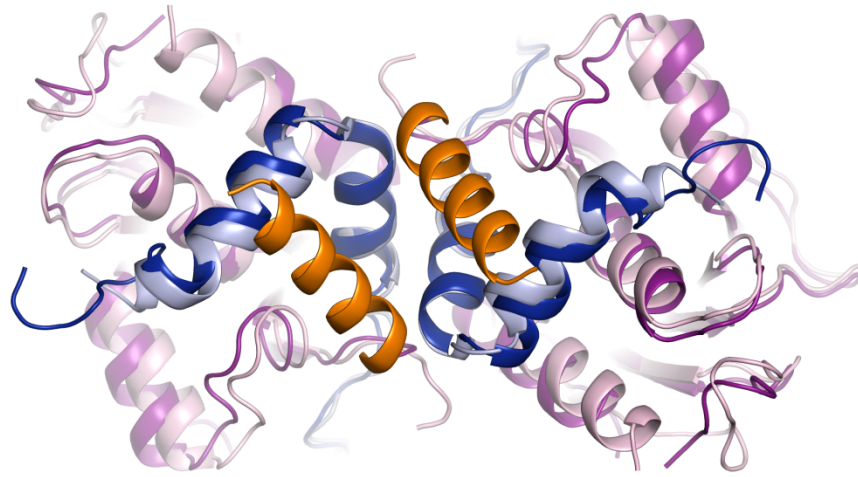

**Figure S7: Superposition of HSV-1 and PRV NEC within the hexagonal lattice.** UL31 is colored lightblue in HSV-1 and darkblue in PRV. UL34 is colored lightpink in HSV-1 and purple in PRV. Helix  $\alpha$ 4 is colored orange. Dimer-formation and thus hexagonal lattice formation in HSV-1 would not be possible with  $\alpha$ 4 in this position.



**Table S1: Residues involved in HSV1 1 NEC formation.** Conserved residues in  $\alpha$  herpesviruses are in bold, strictly conserved residues in  $\alpha$ ,  $\beta$  and  $\gamma$  herpesviruses are bold and underlined. Residues involved in salt bridges and hydrogen bonds are not repeated in Hi bond column. Residues are from chains C and D.

|                   | <b>Interface 1</b> |               |                    |               | <b>Interface 2</b> |               |                    |        |
|-------------------|--------------------|---------------|--------------------|---------------|--------------------|---------------|--------------------|--------|
|                   | <i>Salt bridge</i> | <i>H-bond</i> | <i>hydrophobic</i> |               | <i>Salt bridge</i> | <i>H-bond</i> | <i>hydrophobic</i> |        |
| <b>HSV-1 UL31</b> | <b>Arg58</b>       | <b>His56</b>  | <b>Leu55</b>       | <b>Val79</b>  | <b>Asp104</b>      | Gln100        | Val87              | Thr236 |
|                   | Arg62              | Arg60         | Glu57              | <b>Leu82</b>  | <b>Asp232</b>      | <b>Ala103</b> | Thr90              | Pro239 |
|                   | <b>Glu75</b>       | <b>Tyr61</b>  | Leu64              | <b>Pro85</b>  |                    | <b>Asn105</b> | Pro91              |        |
|                   |                    | Phe65         | Ala66              |               |                    |               | Asp99              |        |
|                   |                    | Arg80         | Leu68              |               |                    |               | Thr101             |        |
|                   |                    | Ser81         | Ala69              |               |                    |               | <b>Val102</b>      |        |
|                   |                    | Ser83         | <b>Pro72</b>       |               |                    |               | Leu116             |        |
|                   |                    | Val84         | Ile76              |               |                    |               | Ile118             |        |
|                   |                    | Leu86         | Ile78              |               |                    |               | Leu135             |        |
| <b>HSV-1 UL34</b> | <b>Arg22</b>       | Ile26         | Leu25              | Gly131        | <b>Arg158</b>      | <b>Asn117</b> | Glu114             |        |
|                   | Asp75              | <b>Tyr68</b>  | Val27              | Asp134        | <b>Arg167</b>      | <b>Gln163</b> | Arg115             |        |
|                   | Glu78              | <b>Arg71</b>  | Pro28              | Leu142        |                    |               | Thr116             |        |
|                   |                    | Asn74         | Ser29              | <b>Asp143</b> |                    |               | Val118             |        |
|                   |                    | <b>Lys137</b> | <b>Pro65</b>       | <b>Arg145</b> |                    |               | Ile119             |        |
|                   |                    | Ala144        | <b>Glu67</b>       | <b>Pro146</b> |                    |               | <b>Phe156</b>      |        |
|                   |                    | Met147        | Leu72              | Met148        |                    |               | Arg161             |        |
|                   |                    | <b>Phe168</b> | <b>Ala77</b>       | Ala149        |                    |               | <b>Leu164</b>      |        |
|                   |                    | <b>Gly170</b> | Pro80              | Ser150        |                    |               | Ala165             |        |
|                   |                    | Glu172        | <b>Cys81</b>       | Trp152        |                    |               |                    |        |
|                   |                    |               | Asn82              | Met169        |                    |               |                    |        |
|                   |                    |               | <b>Pro83</b>       | <b>Pro171</b> |                    |               |                    |        |
|                   |                    |               | Leu130             | Gly175        |                    |               |                    |        |

**Table S2: Residues involved in PRV NEC formation.** Conserved residues in all herpesviruses are in bold, strictly conserved residues in  $\alpha$ -,  $\beta$ - and  $\gamma$ -herpesviruses are bold and underlined. Residues involved in salt bridges and hydrogen bonds are not repeated in H-bond column. Residues are from chains A and B.

|                 | Interface 1        |               |                    | Interface 2        |               |                    |               |       |
|-----------------|--------------------|---------------|--------------------|--------------------|---------------|--------------------|---------------|-------|
|                 | <i>Salt bridge</i> | <i>H-bond</i> | <i>hydrophobic</i> | <i>Salt bridge</i> | <i>H-bond</i> | <i>hydrophobic</i> |               |       |
| <b>PRV UL31</b> | <b>Glu42</b>       | <b>Arg 25</b> | Thr19              | <b>Ala37</b>       | <b>Asp71</b>  | Pro58              | Ile54         | Lys22 |
|                 |                    | <b>Tyr28</b>  | Ala23              | <b>Pro39</b>       | <b>Asp195</b> | Gln67              | Ala57         |       |
|                 |                    | Tyr31         | Ala24              | Asp41              |               | <b>Ala70</b>       | Val59         |       |
|                 |                    | Tyr34         | Arg27              | Val43              |               | <b>Asn72</b>       | Gly66         |       |
|                 |                    | Gln38         | Ala29              | Thr44              |               |                    | Ala68         |       |
|                 |                    | Arg47         | Pro30              | Thr45              |               |                    | Val69         |       |
|                 |                    | Gly48         | Phe32              | <b>Val46</b>       |               |                    | Leu83         |       |
|                 |                    | Ser50         | Ala33              | <b>Leu49</b>       |               |                    | Leu85         |       |
|                 |                    | Asn51         | Ala35              | <b>Pro52</b>       |               |                    | Leu198        |       |
|                 |                    | Leu53         | Ala36              |                    |               |                    | Ala202        |       |
| <b>PRV UL34</b> | <b>Arg8</b>        | Ser14         | Leu11              | <b>Arg131</b>      | <b>Arg144</b> | His101             | Ala99         |       |
|                 |                    | <b>Tyr54</b>  | Ile12              | <b>Pro132</b>      | <b>Arg153</b> | <b>Asn103</b>      | Glu100        |       |
|                 |                    | <b>Ala63</b>  | Gly15              | Arg134             |               | <b>Gln149</b>      | Ile105        |       |
|                 |                    | Leu133        | Asn47              | Ala135             |               |                    | Phe142        |       |
|                 |                    | <b>Phe154</b> | <b>Pro51</b>       | Met136             |               |                    | <b>Pro146</b> |       |
|                 |                    | <b>Gly156</b> | <b>Arg57</b>       | Met155             |               |                    | Arg147        |       |
|                 |                    | Asp158        | Leu58              | <b>Pro157</b>      |               |                    | <b>Leu150</b> |       |
|                 |                    | Arg169        | Arg60              | Gln162             |               |                    | Ser151        |       |
|                 |                    | Arg173        | Ser61              | Thr163             |               |                    | <b>Phe154</b> |       |
|                 |                    |               | His64              | Leu166             |               |                    |               |       |
|                 |                    |               | Pro66              | Leu167             |               |                    |               |       |
|                 |                    |               | Asp120             | Ala170             |               |                    |               |       |
|                 |                    |               | Val128             | Glu171             |               |                    |               |       |
|                 |                    |               | <b>Asp129</b>      | Gln174             |               |                    |               |       |
|                 |                    |               | Thr130             |                    |               |                    |               |       |

**Table S3: Residues involved in hexameric lattice formation.** Conserved residues in  $\alpha$  herpesviruses are in bold, strictly conserved residues in  $\alpha$ ,  $\beta$  and  $\gamma$  herpesviruses are bold and underlined.

|                | <b>UL31 (D)</b>                                                                                                                               | <b>UL34 (C)</b>                                                                                                                                                                                                                     | <b>Interface area (<math>\text{\AA}^2</math>)</b> |
|----------------|-----------------------------------------------------------------------------------------------------------------------------------------------|-------------------------------------------------------------------------------------------------------------------------------------------------------------------------------------------------------------------------------------|---------------------------------------------------|
| <b>Hexamer</b> | 86, 87, 88, 89, 91, 92, 93, <b>94, <u>110</u>, 111, 112, 113, 114</b> , 222, <b>246, 247, 248</b> , 249, 250, <b>252</b> , 260, 262, 301, 302 | 37, 40, 41, 45, 46, <b>47</b> , 48, 49, <b>53</b> , 55, 57, 88, <b>90, <u>91</u>, 92, 93, 95</b> , 101, 102, <b>103</b> , 104, 113, 114, 122, <b>123</b> , 138, 139, 140, <b>141</b> , 142, <b>143</b> , 159, <b>160</b> , 161, 175 | 864                                               |
| <b>Dimer 1</b> | <b>72</b> , 73, 74, 76, 77, 78, 80, 81, 83, <b>120</b> , 126, 127, 136, 138, 139, 141, 142, 145, 146, 229, <b>269</b>                         | 21, 25, 29, 32, 59, <b>171</b> , 172, 173, 174                                                                                                                                                                                      | 697                                               |
| <b>Trimer</b>  | 149, 150, 152, 153, <b>155, 286, 287</b> , 288, <b>291</b> , 295                                                                              |                                                                                                                                                                                                                                     | 180                                               |
|                | <b>UL31 (B)</b>                                                                                                                               | <b>UL34 (A)</b>                                                                                                                                                                                                                     |                                                   |
| <b>Hexamer</b> | 86, 87, 88, 89, 93, <b>94, <u>110</u>, 111, 112, 113, 114</b> , 115, 222, <b>246, 247, 248</b> , 249, 250, 251, <b>252</b> , 260, 302         | 32, 33, 37, 40, 41, 45, 46, <b>47</b> , 48, 49, <b>53</b> , 54, 55, 57, 58, 88, <b>90, <u>91</u>, 92, 93, 95, 103</b> , 104, 112, 113, 114, 122, <b>123</b> , 138, 139, 140, <b>141</b> , 142, 159, <b>160</b>                      | 841                                               |
| <b>Dimer 1</b> | <b>72</b> , 73, 76                                                                                                                            | 14, 17, 18, 21, 22, 25, 29, 30, 32                                                                                                                                                                                                  | 286                                               |
| <b>Dimer 2</b> | <b>286, 287</b> , 288, <b>291</b> , 295                                                                                                       |                                                                                                                                                                                                                                     | 106                                               |
| <b>Trimer</b>  | 136, 138, 139, 141, 142, 145, 146, 149, 150, 152, 153, <b>155</b> , 193, 195, 196, 197, <b>269</b>                                            |                                                                                                                                                                                                                                     | 237                                               |

**Table S4: Previously described noni functional mutants in HSVi 1 and PRV.** SB: salt bridge, HB: hydrogen bond. In double or triple mutants only underlined residue is focused on.

| <b>Solvent-inaccessible/NEC interface</b> |                 |                     |                         |                              |                                                                                   |                                                                  |
|-------------------------------------------|-----------------|---------------------|-------------------------|------------------------------|-----------------------------------------------------------------------------------|------------------------------------------------------------------|
| <b>Residue in HSV-1</b>                   | <b>Mutation</b> | <b>Virus tested</b> | <b>Phenotype</b>        | <b>Location in structure</b> | <b>In vicinity of/interaction with</b>                                            | <b>Reference</b>                                                 |
| UL34 $\Delta$ 1-23                        | deletion        | PRV, HCMV           | No NEC formation        | $\alpha$ 1                   | E75 <sub>31</sub> (SB), F65 <sub>31</sub> (HB)                                    | Passvogel et al., 2013; Milbradt et al., 2012                    |
| UL34 D58/D61/E62                          | A/A/A           | HSV-1               | Reduced complementation | $\beta$ 2- $\beta$ 3         | R158 <sub>34</sub> (SB)                                                           | Bjerke et al., 2003                                              |
| UL34 E67                                  | A               | HSV-1/PRV           | No NEC formation        | $\alpha$ 2                   | K137 <sub>34</sub> (SB)                                                           | Bjerke et al., 2003; Bubeck et al., 2004; Passvogel et al., 2013 |
| UL34 Y68                                  | A               | HSV-1/PRV           | No NEC formation        | $\alpha$ 2                   | E75 <sub>31</sub> (HB), I26 <sub>34</sub> , P65 <sub>34</sub> , V79 <sub>31</sub> | Bubeck et al. 2004; Passvogel et al., 2013                       |
| UL34 E67/V69                              | A/A             | HSV-1               | Not at INM              | $\alpha$ 2                   | I23 <sub>34</sub> , K137 <sub>34</sub> (SB), L130 <sub>34</sub>                   | Bjerke et al., 2003                                              |
| UL34 L70                                  | A               | PRV                 | Reduced complementation | $\alpha$ 2                   | P83 <sub>34</sub> , L85 <sub>34</sub> , M73 <sub>34</sub> , N74 <sub>34</sub>     | Paßvogel et al., 2014                                            |
| UL34 C81                                  | A               | PRV                 | Decreased plaque size   | $\alpha$ 2- $\beta$ 4        | H101 <sub>34</sub> , L46 <sub>34</sub>                                            | Paßvogel et al., 2013                                            |
| UL34 N89                                  | A               | PRV                 | No NEC formation        | $\beta$ 4                    | G91 <sub>34</sub> (HB), P160 <sub>34</sub> (HB), L120 <sub>34</sub> (HB)          | Paßvogel et al., 2014                                            |
| UL34 G91                                  | A               | PRV                 | No NEC formation        | $\beta$ 4- $\beta$ 5         | S122 <sub>34</sub>                                                                | Paßvogel et al., 2014                                            |
| UL34 N117                                 | A               | PRV                 | No complementation      | $\beta$ 6                    | N105 <sub>31</sub> (HB)                                                           | Paßvogel et al., 2014                                            |
| UL34 L120                                 | A               | PRV                 | No NEC formation        | $\beta$ 6                    | E124 <sub>34</sub> -T126 <sub>34</sub>                                            | Paßvogel et al., 2014                                            |
| UL34 L130                                 | A               | PRV                 | No NEC formation        | $\alpha$ 3                   | L70 <sub>34</sub> , R71 <sub>34</sub> , H56 <sub>31</sub>                         | Paßvogel et al., 2014                                            |
| UL34 K137/R139                            | A/A             | HSV-1               | No complementation      | $\alpha$ 3                   | E67 <sub>34</sub> (SB), Y61 <sub>31</sub> (SB)                                    | Bjerke et al., 2003                                              |
| UL34 C155                                 | A               | PRV                 | Decreased plaque size   | $\beta$ 8                    | V94 <sub>34</sub>                                                                 | Paßvogel et al., 2013                                            |
| UL34 R158/R161                            | A/A             | HSV-1               | No complementation      | $\beta$ 8- $\beta$ 9         | D61 <sub>34</sub> (SB), D232 <sub>31</sub> (SB)                                   | Bjerke et al., 2003                                              |
| <b>Solvent-accessible</b>                 |                 |                     |                         |                              |                                                                                   |                                                                  |
| <b>Residue in HSV-1</b>                   | <b>Mutation</b> | <b>Virus tested</b> | <b>Phenotype</b>        | <b>Location in structure</b> | <b>Oligomeric interface</b>                                                       | <b>Reference</b>                                                 |
| UL34 D35/E37                              | A/A             | HSV-1               | No budding              | $\beta$ 1- $\beta$ 2         | hexamer                                                                           | Roller et al., 2010                                              |
| UL34 D58/D61/E62                          | A/A/A           | HSV-1               | Reduced complementation | $\beta$ 2- $\beta$ 3         | hexamer                                                                           | Bjerke et al., 2003                                              |
| UL34 K137/R139                            | A/A             | HSV-1               | No complementation      | $\alpha$ 3                   | hexamer                                                                           | Bjerke et al., 2003                                              |
| UL34 R158/R161                            | A/A             | HSV-1               | No complementation      | $\beta$ 9                    | hexamer                                                                           | Bjerke et al., 2003                                              |
| UL31 L291                                 | A               | PRV                 | Budding impaired        | $\alpha$ 10                  | No (capsids binding site?)                                                        | Paßvogel et al., 2015                                            |

**Table S5: Average ratios of ILV containing GUVs divided by the total number of GUVs counted.** For each set of mutants a negative (no protein) and positive control (wild type) were counted as they vary with each experiment. These values are indicated at the top of each set. To obtain the percentages shown in figure 6C, the background was subtracted from wildtype and mutant values. Mutant values were then divided by wildtype and multiplied by 100%.

| <b>Mutant</b>                                     | <b>AVG (ILV-GUVs)/(total GUVs)</b> |
|---------------------------------------------------|------------------------------------|
| <i>Set 1 (wildtype: 0.117, background: 0.006)</i> |                                    |
| V92F                                              | 0.024                              |
| G91R                                              | 0.138                              |
| D286R                                             | 0.086                              |
| E153R                                             | 0.058                              |
| F252Y                                             | 0.051                              |
| DN                                                | 0.017                              |
| DN/SUP                                            | 0.116                              |
| <i>Set 2 (wildtype: 0.118, background: 0.009)</i> |                                    |
| T123Q                                             | 0.046                              |
| <i>Set 3 (wildtype: 0.187, background: 0.096)</i> |                                    |
| E37A                                              | 0.081                              |
| <i>Set 4 (wildtype: 0.208, background: 0.095)</i> |                                    |
| V247F                                             | 0.128                              |
| SUP                                               | 0.250                              |
| L142E                                             | 0.157                              |
| R49A                                              | 0.180                              |
| <i>Set 5 (wildtype: 0.070, background: 0.007)</i> |                                    |
| V92F/SUP                                          | 0.072                              |
